# Supplementary material for: Genomics of Plasmodium vivax in Colombia reveals evidence of local bottle-necking and inter-country connectivity in the Americas
Source: PubMed Central journal article supplement (PMC10643449; doi:10.1038/s41598-023-46076-1), 2023-11-13
Supplement: 41598_2023_46076_MOESM1_ESM.pdf [file 41598_2023_46076_MOESM1_ESM.pdf]

## Supplementary Information for:

### Genomics of *P. vivax* in Colombia reveals evidence of local bottle-necking and inter-country connectivity in the Americas

Edwin Sutanto<sup>1,2\*</sup>, Zuleima Pava<sup>3\*</sup>, Diego F Echeverry<sup>4,5</sup>, Tatiana M Lopera-Mesa<sup>6</sup>, Lidia Madeline Montenegro<sup>6</sup>, Maria F Yasnot-Acosta<sup>7</sup>, Ernest Diez Benavente<sup>8</sup>, Richard D Pearson<sup>9</sup>, Sócrates Herrera<sup>10</sup>, Myriam Arévalo-Herrera<sup>10,11</sup>, Hidayat Trimarsanto<sup>2,3</sup>, Angela Rumaseb<sup>3</sup>, Rintis Noviyanti<sup>2</sup>, Dominic P Kwiatkowski<sup>9\*\*\*</sup>, Ric N Price<sup>3,12,13</sup>, Sarah Auburn<sup>3,12,13\*\*\*</sup>

1. Exeins Health Initiative, Jakarta, Indonesia
2. Eijkman Institute for Molecular Biology, Jakarta, Indonesia
3. Menzies School of Health Research and Charles Darwin University, Darwin, Australia
4. Departamento de Microbiología, Universidad del Valle, Cali, Colombia
5. International Training and Medical Research Center (CIDEIM), Cali, Colombia
6. Universidad de Antioquia, Medellín, Colombia
7. Grupo de Investigaciones Microbiológicas y Biomédicas de Córdoba (GIMBIC), Universidad de Córdoba, Montería, Colombia
8. Laboratory of Experimental Cardiology, Department of Cardiology, University Medical Center Utrecht, Utrecht, the Netherlands
9. Wellcome Sanger Institute, Cambridge, UK
10. Caucesco Scientific Research Center, Cali, Colombia
11. Universidad del Valle, Cali, Colombia

12. Mahidol-Oxford Tropical Medicine Research Unit, Mahidol University, Bangkok, Thailand

13. Centre for Tropical Medicine and Global Health, Nuffield Department of Medicine, University of  
Oxford, Oxford, UK

\*These authors made equal contributions to the study

\*\*Deceased April 24<sup>th</sup>, 2023

\*\*\*Correspondence to Associate Professor Sarah Auburn: [Sarah.Auburn@menzies.edu.au](mailto:Sarah.Auburn@menzies.edu.au)

## Contents

|                             |    |
|-----------------------------|----|
| Supplementary Figure 1..... | 3  |
| Supplementary Figure 2..... | 5  |
| Supplementary Figure 3..... | 7  |
| Supplementary Table 1.....  | 8  |
| Supplementary Table 2.....  | 9  |
| Supplementary Table 3.....  | 13 |

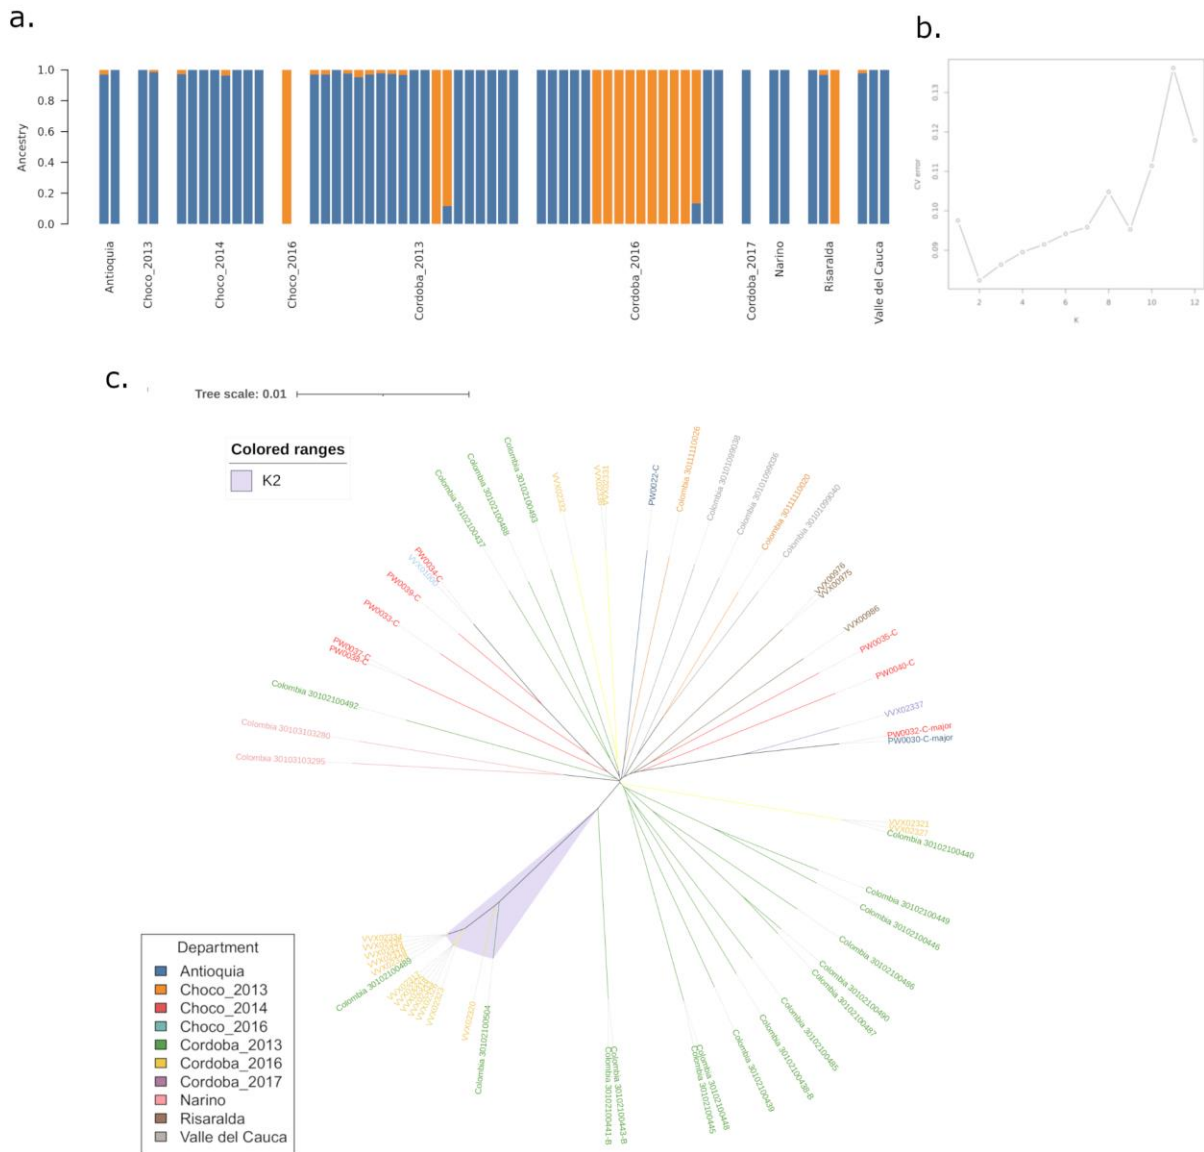

**Supplementary Figure 1. Temporal patterns in infection relatedness within Colombia.**

Panels a) to d) present plots similar to Figure 3, but with annotation by department and year of collection for isolates from the two major study sites: Chocó and Córdoba. Panel b) illustrates ADMIXTURE-based CV error at different values of K, revealing K=2 as the lowest CV error. Panel a) illustrates the proportionate ancestry of samples (vertical bars) to each of the two subpopulations at

K=2. At K=2, the majority of infections have predominant ancestry to K1 (in blue), with the exception of the 2016 Córdoba samples, majority of which had predominant ancestry to K2 (orange). Panel c) presents an unrooted neighbour-joining (NJ) tree illustrating the high relatedness amongst the K2 infections (mostly from 2016). All plots present monoclonal Colombian infections only.

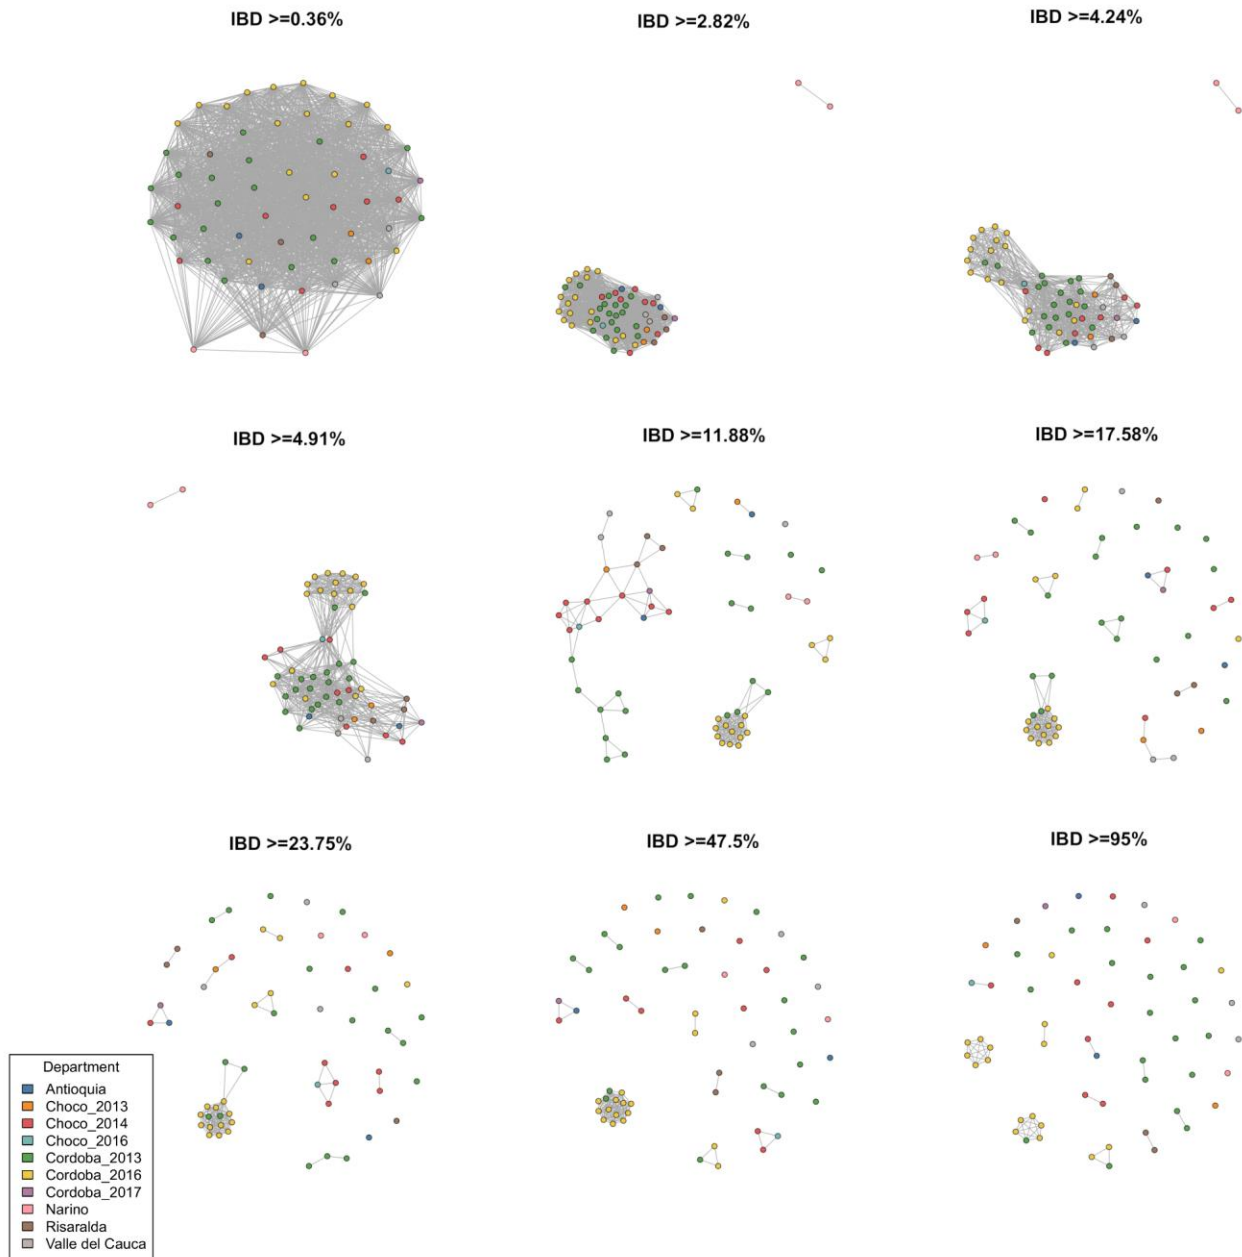

**Supplementary Figure 2. Spatio-temporal patterns in infection relatedness within Colombia at increasing IBD thresholds.**

The cluster networks illustrate connections between infections sharing minimum genomic IBD ranging from 0.36% (allowing capture of distant relatives) to 95% (only capturing near-identical infections). The 2016 Córdoba infections (mostly K2 infections) have the greatest connectivity. However, many

infections from a range of departments and time points exhibit relatively recent connectivity; at ~12% IBD, except for 3 samples, all infections have connectivity with at least one other infection. All plots present monoclonal Colombian infections only.

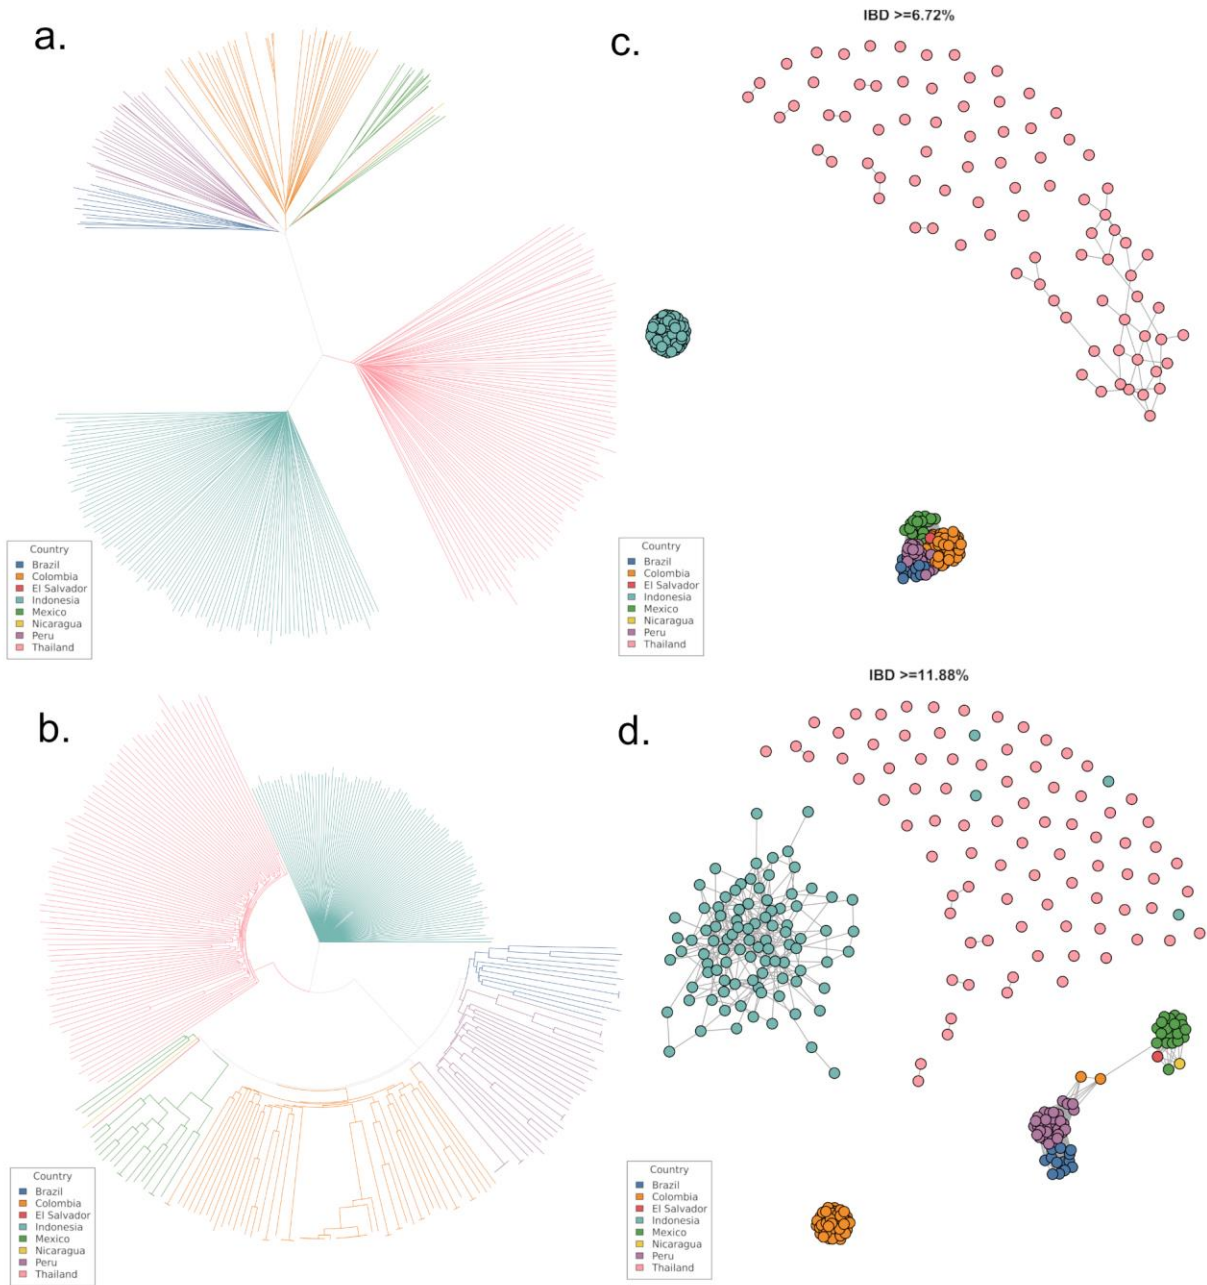

**Supplementary Figure 3. Colombian infection relatedness relative to other global populations.**

Panels a) and b) illustrate rooted and unrooted neighbour-joining (NJ) trees, respectively. Panels c) and d) illustrate Identity by Descent (IBD)-based cluster networks illustrating connections at minimum

thresholds of ~6 and ~12% genomic IBD, respectively. The Central and South American populations exhibit higher relatedness than the Asian populations. All plots present monoclonal infections only.

**Supplementary Table 1. Summary statistics on Identity by Descent within and between countries in the Americas**

| Countries         | Min   | 1st Qu. | Median | Mean  | 3rd Qu. | Max.  |
|-------------------|-------|---------|--------|-------|---------|-------|
| Colombia-Colombia | 0.000 | 0.041   | 0.054  | 0.109 | 0.067   | 1.000 |
| Colombia-Brazil   | 0.000 | 0.002   | 0.004  | 0.004 | 0.006   | 0.014 |
| Colombia- Peru    | 0.000 | 0.002   | 0.004  | 0.005 | 0.006   | 0.097 |
| Colombia-Mexico   | 0.000 | 0.001   | 0.003  | 0.004 | 0.005   | 0.018 |
| Brazil-Brazil     | 0.035 | 0.059   | 0.077  | 0.107 | 0.092   | 0.999 |
| Brazil-Peru       | 0.000 | 0.013   | 0.017  | 0.018 | 0.024   | 0.056 |
| Brazil-Mexico     | 0.000 | 0.002   | 0.004  | 0.004 | 0.005   | 0.016 |
| Peru-Peru         | 0.006 | 0.040   | 0.064  | 0.100 | 0.103   | 1.000 |
| Peru-Mexico       | 0.000 | 0.002   | 0.004  | 0.004 | 0.006   | 0.012 |
| Mexico-Mexico     | 0.004 | 0.022   | 0.315  | 0.297 | 0.455   | 1.000 |

Pairwise Identity by Descent (IBD) data is presented on n=122 independent single clone *P. vivax* samples from Colombia (n=58), Brazil (n=13), Peru (n=32) and Mexico (n=19). Data from El Salvador and Nicaragua was excluded owing to small sample size (n=1 in each population).



**Supplementary Table 2. Summary of multi-SNP regions with evidence of extended haplotype homozygosity**

| Test <sup>1</sup> | Test pops          | Signal <sup>2</sup> | Signal pop <sup>3</sup> | Chromosome  | Coordinates     | Length (bp) | No. SNPs | No. genes | Coordinate and function of maximum test score                           |
|-------------------|--------------------|---------------------|-------------------------|-------------|-----------------|-------------|----------|-----------|-------------------------------------------------------------------------|
| <i>Rsb</i>        | Colombia vs Brazil | 1                   | Brazil                  | PvP01_05_v1 | 331740-338447   | 6708        | 33       | 2         | 331740: Intergenic                                                      |
|                   |                    | 2                   | Brazil                  | PvP01_05_v1 | 368473-368884   | 412         | 8        | 1         | 368533: PVP01_0508200 (HECT-like E3 ubiquitin ligase, putative)         |
|                   |                    | 3                   | Brazil                  | PvP01_05_v1 | 410368-411133   | 766         | 12       | 1         | 410368: PVP01_0509200 (ankyrin-repeat protein, putative)                |
|                   |                    | 4                   | Brazil                  | PvP01_05_v1 | 968076-998445   | 30370       | 72       | 0         | 996872: Intergenic                                                      |
|                   |                    | 5                   | Brazil                  | PvP01_05_v1 | 1033895-1046171 | 12277       | 64       | 3         | 1037784: PVP01_0525600 (conserved protein, unknown function)            |
|                   |                    | 6                   | Brazil                  | PvP01_05_v1 | 1060465-1067336 | 6872        | 3        | 1         | 1066232: PVP01_0526300 (conserved Plasmodium protein, unknown function) |
|                   |                    | 7                   | Brazil                  | PvP01_05_v1 | 1093337-1109944 | 16608       | 16       | 1         | 1096046: PVP01_0526800 (conserved Plasmodium protein, unknown function) |
|                   |                    | 8                   | Brazil                  | PvP01_06_v1 | 286469-289897   | 3429        | 4        | 1         | 286934: PVP01_0606900 (conserved Plasmodium protein, unknown function)  |
|                   |                    | 9                   | Colombia                | PvP01_07_v1 | 1219896-1219915 | 20          | 3        | 1         | 1219896: PVP01_0728900 (merozoite surface protein 1)                    |
|                   |                    | 10                  | Brazil                  | PvP01_08_v1 | 529128-529356   | 229         | 5        | 0         | 529356: Intergenic                                                      |
|                   |                    | 11                  | Brazil                  | PvP01_10_v1 | 1095578-1118212 | 22635       | 28       | 4         | 1117625: PVP01_1025500 (guanidine nucleotide exchange factor, putative) |
|                   |                    | 12                  | Brazil                  | PvP01_10_v1 | 1133974-1139050 | 5077        | 10       | 1         | 1139050: Intergenic                                                     |

|    |        |             |                 |       |     |   |                                                                          |
|----|--------|-------------|-----------------|-------|-----|---|--------------------------------------------------------------------------|
| 13 | Brazil | PvP01_10_v1 | 1160516-1161013 | 498   | 3   | 1 | 1161013: PVP01_1026700 (subtilisin-like ookinete protein SOPT, putative) |
| 14 | Brazil | PvP01_10_v1 | 1242124-1257363 | 15240 | 17  | 2 | 1256540: PVP01_1029200 (conserved Plasmodium protein, unknown function)  |
| 15 | Brazil | PvP01_10_v1 | 1270515-1281406 | 10892 | 26  | 4 | 1275305: Intergenic                                                      |
| 16 | Brazil | PvP01_10_v1 | 1302296-1309794 | 7499  | 14  | 1 | 1307150: PVP01_1030300 (myosin B, putative)                              |
| 17 | Brazil | PvP01_10_v1 | 1383677-1408029 | 24353 | 130 | 4 | 1388438: Intergenic                                                      |
| 18 | Brazil | PvP01_14_v1 | 2862026-2862061 | 36    | 3   | 1 | 2862061: PVP01_1467200 (osmiophilic body protein G377, putative)         |
| 19 | Brazil | PvP01_14_v1 | 2901596-2920813 | 19218 | 122 | 5 | 2914950: Intergenic                                                      |

---

|            |                             |             |                 |       |     |   |                                                                                 |
|------------|-----------------------------|-------------|-----------------|-------|-----|---|---------------------------------------------------------------------------------|
| <b>Rsb</b> | <b>Colombia vs Thailand</b> |             |                 |       |     |   |                                                                                 |
| 1          | Thailand                    | PvP01_02_v1 | 140333-154843   | 14511 | 244 | 2 | 149267: Intergenic                                                              |
| 2          | Thailand                    | PvP01_05_v1 | 1066227-1067363 | 1137  | 4   | 1 | 1067159: PVP01_0526300 (conserved Plasmodium protein, unknown function)         |
| 3          | Thailand                    | PvP01_05_v1 | 1093275-1096057 | 2783  | 14  | 1 | 1093275: PVP01_0526800 (conserved Plasmodium protein, unknown function)         |
| 4          | Colombia                    | PvP01_09_v1 | 756189-756416   | 228   | 4   | 1 | 756374: PVP01_0916800 (pyridoxine biosynthesis protein PDX2, putative)          |
| 5          | Colombia                    | PvP01_11_v1 | 676991-677295   | 305   | 8   | 1 | 677222: PVP01_1115800 (conserved Plasmodium protein, unknown function)          |
| 6          | Colombia                    | PvP01_11_v1 | 1423431-1431629 | 8199  | 8   | 2 | 1423431: PVP01_1133300 (conserved oligomeric Golgi complex subunit 4, putative) |
| 7          | Colombia                    | PvP01_11_v1 | 1557314-1557384 | 71    | 3   | 1 | 1557328: PVP01_1136400 (6-cysteine protein P12)                                 |

|            |                              |           |             |                 |       |      |    |                                                                                       |
|------------|------------------------------|-----------|-------------|-----------------|-------|------|----|---------------------------------------------------------------------------------------|
|            | 8                            | Colombia  | PvP01_12_v1 | 324253-324862   | 610   | 13   | 1  | 324601: PVP01_1208000 (6-cysteine protein P47)                                        |
|            | 9                            | Colombia  | PvP01_12_v1 | 2873923-2874598 | 676   | 3    | 1  | 2874006: PVP01_1268600 (metacaspase-2, putative)                                      |
|            | 10                           | Thailand  | PvP01_13_v1 | 808294-815132   | 6839  | 31   | 2  | 814651: PVP01_1317300 (conserved Plasmodium protein, unknown function)                |
| <b>Rsb</b> | <b>Colombia vs Indonesia</b> |           |             |                 |       |      |    |                                                                                       |
|            | 1                            | Indonesia | PvP01_10_v1 | 239319-326974   | 87656 | 1208 | 20 | 318227: PVP01_1007200 (conserved Plasmodium protein, unknown function, pseudogene)    |
|            | 2                            | Indonesia | PvP01_10_v1 | 343467-347540   | 4074  | 7    | 1  | 345358: PVP01_1007600 (ADP-ribosylation factor GTPase-activating protein 2, putative) |
|            | 3                            | Colombia  | PvP01_11_v1 | 1265741-1266097 | 357   | 5    | 1  | 1266088: PVP01_1129500 (PIMMS43 protein, putative)                                    |
|            | 4                            | Indonesia | PvP01_14_v1 | 2861540-2928574 | 67035 | 714  | 14 | 2862053: PVP01_1467200 (osmiophilic body protein G377, putative)                      |
| <b>Rsb</b> | <b>Colombia vs Peru</b>      |           |             |                 |       |      |    |                                                                                       |
|            | 1                            | Peru      | PvP01_05_v1 | 210189-212471   | 2283  | 5    | 0  | 210191: Intergenic                                                                    |
|            | 2                            | Peru      | PvP01_06_v1 | 838830-838838   | 9     | 4    | 1  | 838830: PVP01_0620700 (conserved Plasmodium protein, unknown function)                |
|            | 3                            | Peru      | PvP01_08_v1 | 1338680-1339247 | 568   | 7    | 0  | 1339247: Intergenic                                                                   |
|            | 4                            | Peru      | PvP01_09_v1 | 337963-339487   | 1525  | 29   | 1  | 339133: PVP01_0905700 (calcium/calmodulin-dependent protein kinase, putative)         |
|            | 5                            | Peru      | PvP01_09_v1 | 1320736-1322087 | 1352  | 4    | 1  | 1321747: Intergenic                                                                   |
|            | 6                            | Peru      | PvP01_11_v1 | 75780-75861     | 82    | 4    | 1  | 75803: PVP01_1101500 (Plasmodium exported protein, unknown function)                  |

|    |          |             |                 |      |   |   |                                                                                   |
|----|----------|-------------|-----------------|------|---|---|-----------------------------------------------------------------------------------|
| 7  | Peru     | PvP01_12_v1 | 716454-717078   | 625  | 6 | 1 | 717004: PVP01_1217200 (conserved Plasmodium protein, unknown function)            |
| 8  | Peru     | PvP01_12_v1 | 843439-843517   | 79   | 4 | 1 | 843439: PVP01_1221100 (U3 small nucleolar RNA-associated protein 4, putative)     |
| 9  | Peru     | PvP01_12_v1 | 1420836-1429698 | 8863 | 5 | 0 | 1429698: Intergenic                                                               |
| 10 | Colombia | PvP01_12_v1 | 2580337-2580601 | 265  | 6 | 1 | 2580439: PVP01_1262700 (1-acyl-sn-glycerol-3-phosphate acyltransferase, putative) |

---

<sup>1</sup> No multi-SNP signals were detected with the *iHS* test. <sup>2</sup> SNP-based p-values corresponding with thresholds of *iHS*  $\geq 4$  and *Rsb*  $\geq 5$  were considered significant, and candidate signals of selection were defined as regions with a minimum of 3 significant SNPs within a 10 kb window. Data is derived from independent single clone *P. vivax* samples with single representation of infection clusters exhibiting pairwise IBD $\geq 0.95$ ; Colombia (n=39), Brazil (n=12), Peru (n=26), Mexico (n=17), Thailand (n=85) and Indonesia (n=98).

**Supplementary Table 3. Copy number in the Colombian samples at globally detected *P. vivax* tandem**

**duplications**

| <b>MalariaGEN sample identifier</b> | <b>Department</b> | <b>DBP<sup>1</sup> copy number</b> | <b>PvP01_09<sup>2</sup> copy number</b> | <b>MDR1<sup>3</sup> copy number</b> | <b>PVP01_146820 0<sup>4</sup> copy number</b> |
|-------------------------------------|-------------------|------------------------------------|-----------------------------------------|-------------------------------------|-----------------------------------------------|
| Colombia_30101099036                | Valle del Cauca   | NA                                 | NA                                      | NA                                  | NA                                            |
| Colombia_30101099038                | Valle del Cauca   | NA                                 | NA                                      | NA                                  | NA                                            |
| Colombia_30101099040                | Valle del Cauca   | NA                                 | NA                                      | NA                                  | NA                                            |
| Colombia_30102100437                | Cordoba           | NA                                 | NA                                      | NA                                  | NA                                            |
| Colombia_30102100438-B              | Cordoba           | NA                                 | NA                                      | NA                                  | NA                                            |
| Colombia_30102100439                | Cordoba           | NA                                 | NA                                      | NA                                  | NA                                            |
| Colombia_30102100440                | Cordoba           | NA                                 | NA                                      | NA                                  | NA                                            |
| Colombia_30102100441-B              | Cordoba           | NA                                 | NA                                      | NA                                  | NA                                            |
| Colombia_30102100443-B              | Cordoba           | NA                                 | NA                                      | NA                                  | NA                                            |
| Colombia_30102100445                | Cordoba           | NA                                 | NA                                      | NA                                  | NA                                            |
| Colombia_30102100446                | Cordoba           | NA                                 | NA                                      | NA                                  | NA                                            |
| Colombia_30102100448                | Cordoba           | NA                                 | NA                                      | NA                                  | NA                                            |
| Colombia_30102100449                | Cordoba           | NA                                 | NA                                      | NA                                  | NA                                            |
| Colombia_30102100485                | Cordoba           | NA                                 | NA                                      | NA                                  | NA                                            |
| Colombia_30102100486                | Cordoba           | NA                                 | NA                                      | NA                                  | NA                                            |
| Colombia_30102100487                | Cordoba           | NA                                 | NA                                      | NA                                  | NA                                            |
| Colombia_30102100488                | Cordoba           | NA                                 | NA                                      | NA                                  | NA                                            |
| Colombia_30102100489                | Cordoba           | NA                                 | NA                                      | NA                                  | NA                                            |
| Colombia_30102100490                | Cordoba           | NA                                 | NA                                      | NA                                  | NA                                            |
| Colombia_30102100492                | Cordoba           | NA                                 | NA                                      | NA                                  | NA                                            |
| Colombia_30102100493                | Cordoba           | NA                                 | NA                                      | NA                                  | NA                                            |
| Colombia_30102100504                | Cordoba           | NA                                 | NA                                      | NA                                  | NA                                            |
| Colombia_30103103280                | Narino            | NA                                 | NA                                      | NA                                  | NA                                            |
| Colombia_30103103295                | Narino            | NA                                 | NA                                      | NA                                  | NA                                            |
| Colombia_30111110020                | Choco             | NA                                 | NA                                      | NA                                  | NA                                            |
| Colombia_30111110026                | Choco             | NA                                 | NA                                      | NA                                  | NA                                            |
| PW0022-C                            | Antioquia         | NA                                 | NA                                      | NA                                  | NA                                            |
| PW0033-C                            | Choco             | 1                                  | 1                                       | 1                                   | 1                                             |
| PW0034-C                            | Choco             | 1                                  | 1                                       | 1                                   | 1                                             |
| PW0035-C                            | Choco             | 1                                  | 1                                       | 1                                   | 1                                             |
| PW0037-C                            | Choco             | 1                                  | 1                                       | 1                                   | 1                                             |
| PW0038-C                            | Choco             | 1                                  | 1                                       | 1                                   | 1                                             |
| PW0039-C                            | Choco             | 1                                  | 1                                       | 1                                   | 1                                             |
| PW0040-C                            | Choco             | 1                                  | 1                                       | 1                                   | 1                                             |
| VVX00975                            | Risaralda         | NA                                 | NA                                      | NA                                  | NA                                            |
| VVX00976                            | Risaralda         | NA                                 | NA                                      | NA                                  | NA                                            |
| VVX00986                            | Risaralda         | NA                                 | NA                                      | NA                                  | NA                                            |
| VVX01000                            | Choco             | NA                                 | NA                                      | NA                                  | NA                                            |
| VVX02317                            | Cordoba           | NA                                 | NA                                      | NA                                  | NA                                            |

|          |         |    |    |    |    |
|----------|---------|----|----|----|----|
| VVX02318 | Cordoba | 1  | 1  | 1  | 1  |
| VVX02319 | Cordoba | 1  | 1  | 1  | 1  |
| VVX02320 | Cordoba | 1  | 1  | 1  | 1  |
| VVX02321 | Cordoba | 1  | 1  | 1  | 1  |
| VVX02323 | Cordoba | 1  | 1  | 1  | 1  |
| VVX02324 | Cordoba | 1  | 1  | 1  | NA |
| VVX02325 | Cordoba | 1  | 1  | 1  | 1  |
| VVX02326 | Cordoba | 1  | 1  | 1  | 1  |
| VVX02327 | Cordoba | 1  | 1  | 1  | 1  |
| VVX02328 | Cordoba | 1  | 1  | 1  | 1  |
| VVX02331 | Cordoba | 1  | 1  | 1  | 1  |
| VVX02332 | Cordoba | 1  | 1  | 1  | NA |
| VVX02333 | Cordoba | 1  | 1  | 1  | 1  |
| VVX02334 | Cordoba | 1  | 1  | NA | 1  |
| VVX02335 | Cordoba | 1  | 1  | 1  | 1  |
| VVX02336 | Cordoba | 1  | 1  | 1  | 1  |
| VVX02337 | Cordoba | NA | NA | NA | NA |

Copy number was determined at 4 gene regions where large (>3 Kb) tandem duplications have been detected in *P. vivax* infections in the global MalariaGEN Pv 4.0 data set: <sup>1</sup> Breakpoint located at PvP01\_06\_v1 from 980472 to 988669, with longest breakpoint length at 8179 bp; encompasses *pvdhp*. <sup>2</sup> Breakpoint located at PvP01\_09\_v1 from 392555 to 437388, with breakpoint length at 44831 bp; encompasses eight genes on chromosome 9. <sup>3</sup> Breakpoint located at PvP01\_10\_v1 from 468190 to 506339, with breakpoint length at 38134 bp; encompasses *pvmdr1* and eight other genes on chromosome 10. <sup>4</sup> Breakpoint located at PvP01\_14\_v1 from 2894706 to 2921162, with longest breakpoint length at 26452 bp; encompasses PVP01\_1468200 – a conserved Plasmodium protein with unknown function. NA (not applicable) indicates samples/sites which did not meet the required read depth thresholds for robust copy number determination. Data is derived from a starting set of n=56 independent single clone *P. vivax* samples from Colombia.
